# Supplementary material
Source: HighWire-hosted journal article supplement (https://gut.bmj.com/content/70/9/1805)
Supplement: inline-supplementary-material-1 [file inline-supplementary-material-1.pdf]

## Methods

### Policy for COVID-19 testing

The patients undergoing endoscopic procedures were not tested routinely for COVID-19 except at one of the participating centres (SGPGI). They were tested only if they had any symptoms suggestive of COVID-19, had a history of contact with COVID-19 positive patient or had a history of travel or stay in containment zones. The patients were also followed up telephonically after two weeks of their endoscopic procedure for COVID-19 related symptoms or confirmed diagnosis of COVID-19 after endoscopic procedures. The healthcare workers involved in the endoscopy procedures and those posted in the endoscopy theatre were screened for symptoms periodically and tested in case of either new onset symptom suggestive of COVID-19 or contact with a positive patient. Infection to the endoscopic personnel and patients was confirmed by RT-PCR of throat and nasal swabs. The centre that was routinely performing COVID-19 testing prior to every endoscopic procedure was excluded from the safety and cost benefit analysis.

### Measures for prevention of cross infection in endoscopy suite

All the centres followed a standard protocol as advised by multiple guidelines to minimize the risk of the spread of infection in the endoscopy suite. Entry to the endoscopy suite was restricted and only one relative of patient was allowed to enter. All the patients were provided with face masks which was removed only during the endoscopic procedure. Procedure was completed preferably in the same trolley used to shift the patient to endoscopy suite rather than shifting to the endoscopy suite trolley. The number of endoscopy personnel in the suite was limited with only one senior skilled endoscopist and limited number of nurse assistants. The endoscopy personnel switched to the hospital scrubs after entering the endoscopy suite followed by donning of level 2 PPE which included a head to toe water impermeable gown,

hairnet, shoe cover, N95 masks, face shield or goggles and double pair of gloves. The same endoscopy team performed all the endoscopic procedures scheduled during one day and repeated donning and doffing was avoided in view of restricted supply with only change of outer pair of gloves between procedures. Only one endoscopic procedure was performed at one time. After each procedure, the endoscope was disinfected with 2% glutaraldehyde solution. A thorough cleaning of the endoscopy suite was done at the end of the day with 1% hypochlorite solution.

## Results

Supplementary Table. Details of Endoscopic procedures performed during lockdown to combat COVID-19 pandemic

|                                      | AIIMS       | GB Pant     | PGIMER     | CMC        | SGPGI      | Total       |
|--------------------------------------|-------------|-------------|------------|------------|------------|-------------|
| Total Number of Procedures Performed | 290         | 340         | 274        | 545        | 100        | 1549        |
| <b>A. EGD</b>                        |             |             |            |            |            |             |
| Total number                         | 220         | 234         | 180        | 362        | 68         | 1064        |
| <b>Indications</b>                   |             |             |            |            |            |             |
| Upper GI bleeding                    | 148 (67.3%) | 129 (55.2%) | 78 (43.3%) | 96 (26.5%) | 40 (58.8%) | 491 (46.1%) |
| Dysphagia                            | 13 (5.9%)   | 39 (16.7%)  | 31 (17.2%) | 29 (8%)    | 2 (2.9%)   | 114 (10.7%) |
| Foreign body removal                 | 0           | 4 (1.7%)    | 0          | 5 (1.4%)   | 1 (1.5%)   | 10 (0.9%)   |
| Gastric outlet obstruction           | 18 (8.2%)   | 20 (8.5%)   | 33 (18.3%) | 6 (1.7%)   | 5 (7.4%)   | 82 (7.7%)   |
| Corrosive injury                     | 15 (6.8%)   | 28 (12%)    | 6 (3.3%)   | 17 (4.7%)  | 0          | 66 (6.2%)   |
| Functional bowel disorders           | 11 (5%)     | 8 (3.4%)    | 0          | 62 (17.1%) | 4 (5.9%)   | 85 (8%)     |
| Enteral tube placement (RT/NJ/PEG)   | 13 (5.9%)   | 6 (2.6%)    | 31 (17.2%) | 25 (6.9%)  | 6 (8.8%)   | 81 (7.6%)   |
| Cancer screening                     | 1 (0.5%)    | 0           | 0          | 32 (8.8%)  | 0          | 33 (3.1%)   |
| Variceal assessment                  | 0           | 0           | 0          | 33 (9.1%)  | 0          | 33 (3.1%)   |
| Anemia evaluation                    | 0           | 0           | 0          | 20 (5.5%)  | 0          | 20 (1.9%)   |
| Evaluation for recurrent vomiting    | 0           | 0           | 0          | 17 (4.7%)  | 0          | 17 (1.6%)   |
| Chronic diarrhoea for biopsy         | 0           | 0           | 0          | 102.8%)    | 5          | 15 (1.4%)   |
| Removal of SEMS                      | 0           | 0           | 0          | 4 (1.1%)   | 0          | 4 (0.4%)    |
| Others                               | 1¥ (0.5%)   | 0           | 1¥ (0.6%)  | 6¥ (1.7%)  | 5¥ (7.4%)  | 13 (1.2%)   |
| <b>Findings on EGD</b>               |             |             |            |            |            |             |
| Normal Study                         | 6 (2.7%)    | 11 (4.7%)   | 2 (1.1%)   | 12 (3.3%)  | 8 (11.8%)  | 39 (3.7%)   |

|                                             |             |            |            |             |            |             |
|---------------------------------------------|-------------|------------|------------|-------------|------------|-------------|
| Benign esophageal stricture                 | 10 (4.5%)   | 22 (9.4%)  | 6 (6.1%)   | 9 (2.5%)    | 0          | 47 (4.4%)   |
| Carcinoma esophagus                         | 11 (5%)     | 13 (5.6%)  | 11         | 9 (2.5%)    | 2 (2.9%)   | 46 (4.3%)   |
| GERD/esophagitis                            | 1 (0.5%)    | 0          | 0          | 26 (7.2%)   | 2 (2.9%)   | 29 (2.7%)   |
| Esophageal ulcer                            | 0           | 0          | 0          | 4 (1.1%)    | 0          | 4 (0.4%)    |
| Esophageal candidiasis                      | 0           | 0          | 0          | 9 (2.5%)    | 1 (1.5%)   | 10 (0.9%)   |
| Esophageal Varices                          | 86 (39.1%)  | 73 (31.2%) | 53 (29.4%) | 55 (15.2%)  | 13 (19.1%) | 280 (26.3%) |
| Fundal varices                              | 21 (9.5%)   | 6 (2.5%)   | 10 (5.6%)  | 19 (5.3%)   | 4 (5.9%)   | 60 (5.6%)   |
| PHG                                         | 8 (3.6%)    | 19 (8.2%)  | 7 (3.9%)   | 31 (8.6%)   | 7 (10.3%)  | 72 (6.8%)   |
| Gastric antral vascular ectasia             | 2 (0.9%)    | 3 (1.3%)   | 2 (1.1%)   | 3 (0.8%)    | 3 (4.4%)   | 12 (1.1%)   |
| Mallory Weiss Tear                          | 3 (1.4%)    | 0          | 1 (0.6%)   | 5 (1.4%)    | 0          | 9 (0.8%)    |
| Gastritis                                   | 7 (3.2%)    | 11 (4.7%)  | 10 (5.5%)  | 73 (20.2%)  | 8 (11.8%)  | 109 (10.2%) |
| Duodenal ulcer                              | 9 (4.1%)    | 9 (3.8%)   | 18 (10%)   | 14 (3.9%)   | 2 (2.9%)   | 52 (4.9%)   |
| Gastric Ulcer                               | 10 (4.5%)   | 8 (3.4%)   | 6 (3.3%)   | 18 (5%)     | 3 (4.4%)   | 45 (4.2%)   |
| Gastric polyps                              | 0           | 4 (1.7%)   | 0          | 4 (1.1%)    | 0          | 8 (0.8%)    |
| Gastric Malignancy                          | 14 (6.4%)   | 18 (7.7%)  | 8 (4.4%)   | 21 (5.8%)   | 2 (2.9%)   | 63 (5.9%)   |
| Benign Gastric outlet obstruction           | 3 (1.4%)    | 2 (0.9%)   | 6 (3.3%)   | 2 (0.6%)    | 5 (7.4%)   | 18 (1.7%)   |
| Malignant Gastric outlet obstruction        | 14 (6.4%)   | 16 (6.8%)  | 25 (13.9%) | 8 (2.2%)    | 3 (4.4%)   | 66 (6.2%)   |
| Post EVL ulcers                             | 5 (2.3%)    | 5 (2.1%)   | 0          | 2 (0.6%)    | 0          | 12 (1.1%)   |
| Others                                      | 1a (0.5%)   | 1a (0.4%)  | 0          | 4a (1.1%)   | 4a (5.9%)  | 10 (1%)     |
| <b>Therapy Done</b>                         |             |            |            |             |            |             |
| None/biopsy                                 | 129 (58.6%) | 145 (62%)  | 85 (47.2%) | 288 (79.6%) | 49 (72.1%) | 676 (63.5%) |
| Esophageal stricture dilatation             | 1 (0.5%)    | 22 (9.4%)  | 12 (6.7%)  | 5 (1.4%)    | 1 (1.5%)   | 41 (3.9%)   |
| Variceal Band Ligation                      | 66 (30%)    | 48 (20.5%) | 40 (22.2%) | 16 (4.4%)   | 9 (13.2%)  | 179 (16.8%) |
| Glue injection                              | 23 (10.5%)  | 6 (2.6%)   | 6 (3.3%)   | 6 (1.7%)    | 1 (1.5%)   | 42 (3.9%)   |
| Sclerotherapy                               | 0           | 1 (0.4%)   | 1 (0.6%)   | 4 (1.1%)    | 2 (2.9%)   | 8 (0.8%)    |
| APC application                             | 6 (2.7%)    | 1 (0.4%)   | 1 (0.6%)   | 3 (0.8%)    | 1 (1.5%)   | 12 (1.1%)   |
| Hemoclip application                        | 3 (1.4%)    | 1 (0.4%)   | 4 (2.2%)   | 14 (3.9%)   | 0          | 22 (2.1%)   |
| Enteral Tube placement (RT/NJ)              | 12 (5.5%)   | 6 (2.5%)   | 31 (17.2%) | 24 (6.6%)   | 5 (7.4%)   | 78 (7.3%)   |
| Thermocoagulation                           | 0           | 4 (1.7%)   | 0          | 0           | 0          | 4 (0.4%)    |
| Adrenaline injection                        | 0           | 0          | 0          | 2 (0.6%)    | 0          | 2 (0.2%)    |
| Others                                      | 3b (1.4%)   | 3b (1.3%)  | 1b (0.6%)  | 4b (1.1%)   | 1b (1.5%)  | 12 (1.1%)   |
| <b>B. Colonoscopy</b>                       |             |            |            |             |            |             |
| <b>Total number of procedures performed</b> | 23          | 40         | 45         | 101         | 15         | 224         |
| <b>Indications of procedure</b>             |             |            |            |             |            |             |
| Lower GI bleeding                           | 21 (91.3%)  | 29 (72.5%) | 43 (95.6%) | 35 (34.7%)  | 10 (66.7%) | 138 (61.6%) |
| Cancer screening                            | 0           | 0          | 0          | 35 (34.7%)  | 4 (26.7%)  | 39 (17.4%)  |
| Altered bowel habits                        | 0           | 0          | 0          | 5 (5%)      | 0          | 5 (2.2%)    |

|                                                |             |              |            |             |               |                 |
|------------------------------------------------|-------------|--------------|------------|-------------|---------------|-----------------|
| Suspected IBD                                  | 1 (4.4%)    | 0            | 0          | 15 (14.9%)  | 1 (6.7%)      | 17 (7.6%)       |
| Anemia evaluation                              | 0           | 0            | 0          | 6 (5.9%)    | 0             | 6 (2.7%)        |
| Others                                         | 1c (4.4%)   | 11c (27.5%)  | 2c (4.4%)  | 5c (5%)     | 0             | 19 (8.5%)       |
| <b>Findings on colonoscopy</b>                 |             |              |            |             |               |                 |
| Normal Study                                   | 7 (30.4%)   | 5 (12.5%)    | 19 (42.2%) | 34 (33.7%)  | 0             | 65 (29%)        |
| Colonic ulcers (IBD related)                   | 3 (13%)     | 11 (27.5%)   | 10 (22.2%) | 8 (7.9%)    | 2 (13.3%)     | 34 (15.2%)      |
| Colonic ulcers (infective)                     | 3 (13%)     | 1 (2.5%)     | 10 (22.2%) | 8 (7.9%)    | 2 (13.3%)     | 24 (10.7%)      |
| Colonic malignancy                             | 1 (4.4%)    | 12 (30%)     | 3 (6.7%)   | 9 (8.9%)    | 1 (6.7%)      | 26 (11.6%)      |
| Colonic polyps                                 | 0           | 3 (7.5%)     | 0          | 18 (17.8%)  | 4 (26.7%)     | 25 (11.2%)      |
| Diverticula                                    | 1 (4.4%)    | 0            | 0          | 2 (2%)      | 0             | 3 (1.3%)        |
| Hemorrhoids                                    | 6 (26.1%)   | 6 (15%)      | 0          | 8 (7.9%)    | 4 (26.7%)     | 24 (10.7%)      |
| Others                                         | 2d (8.7%)   | 2d (5%)      | 3d (6.7%)  | 14d (13.9%) | 2d (13.3%)    | 23 (10.3%)      |
| <b>Therapy Performed</b>                       |             |              |            |             |               |                 |
| None/biopsy                                    | 20 (87%)    | 38 (95%)     | 44 (97.8%) | 81 (80.2%)  | 13 (86.7%)    | 196 (87.5%)     |
| Hemoclip application                           | 1 (4.3%)    | 0            | 0          | 1 (1%)      | 0             | 2 (0.9%)        |
| Polypectomy                                    | 0           | 2 (5%)       | 0          | 7 (6.9%)    | 0             | 9 (4%)          |
| APC Application                                | 2 (8.7%)    | 0            | 1 (2.2%)   | 2 (2%)      | 0             | 5 (2.2%)        |
| Hemorrhoidal banding                           | 0           | 0            | 0          | 0           | 2 (13.3%)     | 2 (0.9%)        |
| Others                                         | 0           | 0            | 0          | 4e (4%)     | 0             | 4 (1.8%)        |
| <b>C. ERCP</b>                                 |             |              |            |             |               |                 |
| Total number of procedures performed           | 32          | 48           | 47         | 37          | 13            | 177             |
| <b>Indication for the procedure</b>            |             |              |            |             |               |                 |
| Cholangitis                                    | 29/32       | 38/48        | 38/47      | 6/37        | 6/13 (46.2%)  | 87/177 (49.2%)  |
| CBD stone                                      | 21/32       | 27/48        | 30/47      | 20/37       | 4/13 (30.8%)  | 102/177 (57.6%) |
| CBD stricture (benign)                         | 3/32        | 9/48         | 7/47       | 3/37        | 2/13 (15.4%)  | 24/177 (13.6%)  |
| Preoperative biliary drainage                  | 2/32        | 5/48         | 4/47       | 2/37        | 0             | 13/177 (7.3%)   |
| Palliative biliary drainage                    | 6/32        | 4/48         | 2/47       | 4/37        | 1/13 (7.7%)   | 17/177 (9.6%)   |
| Therapy for chronic pancreatitis               | 0           | 3/48         | 4/47       | 1/37        | 4/13 (30.8%)  | 12/177 (6.8%)   |
| Others                                         | 0           | 0            | 0          | 1/37 f      | 1/15 (7.7%) f | 2/177 (1.1%)    |
| <b>D. Endosonography</b>                       |             |              |            |             |               |                 |
| Total procedures                               | 3           | 18           | 2          | 34          | 4             | 61              |
| Diagnostic procedures                          | 2/3 (66.7%) | 2/18 (11.1%) | 2/2 (100%) | 17 (50%)    | 2/4 (50%)     | 25/61 (41%)     |
| FNA                                            | 0           | 10 (55.6%)   | 0          | 9 (26.5%)   | 1/4 (25%)     | 20/61 (32.8%)   |
| Drainage of pancreatic fluid collection        | 1 (33.3%)   | 4 (22.2%)    | 0          | 5 (14.7%)   | 1/4 (25%)     | 11/61 (18%)     |
| Biliary drainage                               | 0           | 2 (11.1%)    | 0          | 0           | 0             | 2/61 (3.3%)     |
| Variceal Injection                             | 0           | 0            | 0          | 3 (8.8%)    | 0             | 3/61 (4.9%)     |
| <b>E. Percutaneous endoscopic necrosectomy</b> | 6           | 0            | 0          | 0           | 0             | 6               |

|                            |    |   |   |     |   |    |
|----------------------------|----|---|---|-----|---|----|
| <b>F. Other procedures</b> | 6g | 0 | 0 | 11g | 0 | 17 |
|----------------------------|----|---|---|-----|---|----|

¥ AIIMS: Tracheoesophageal fistula

¥ PGIMER: Tracheoesophageal fistula

¥ (CMC): Tracheoesophageal fistula, Aortoesophageal fistula (graft assessment), Healing of Gastric ulcer, Persistent Hiccough, Post op repair of Gastric perforation, GVHD suspect

¥ (SGPGI) Periampullary growth-4, Ascites under evaluation-1

a (AIIMS): TEF

a (GB Pant): Esophageal lymphoma with SEMS block

a (CMC): TEF-1; esophageal SM lesion-1; choledochoduodenal fistula-1; Achalasia Cardia-1, duodenal varix-1

a (SGPGI): Periampullary growth-4

b (AIIMS): Esophageal SEMS-1; pyloric stricture dilatation-1; Antral SEMS-1

b (Gb Pant): Esophageal SEMS-1; pyloric stricture dilatation-1; Antral SEMS-1

b (PGIMER): Esophageal SEMS

b (CMC): Sengstaken Blakemore Tube placement-2; Hemospray-2

b (SGPGI): foreign body removal-1

c (AIIMS) stricture-1

c (PGIMER): strictures dilatation-2

c (CMC) Abdominal pain-suspected GI Tuberculosis, suspected GI vasculitis, pyrexia of unknown origin, 2 sigmoid volvulus decompression

d (AIIMS): Radiation proctitis-2

d (GBPH): Rectal varices-2

d (PGIMER): Stricture -2, radiation proctitis-1

d (CMC) Sigmoid hematoma-1, Non-specific ileal inflammation-1, acute colitis-1, sigmoid volvulus-2, stricture-2, angioectasia-1, SRUS-1, stercoral ulcer-1, amyloid angiopathy-1, GVHD-1, GIST-1, Radiation proctitis-1

e (CMC) EMR-1, colonic decompression-2, SEMS-1

f (CMC): Brush cytology

f (SGPGI): Bile leak

g (AIIMS): Sigmoidoscopy-6

g (CMC): Double balloon enteroscopy-1. Side viewing enoscopy-4, sigmoidoscopy-6

Institutes: **AIIMS**: All India Institute of Medical Sciences, New Delhi; **CMC**: Christian Medical college, Vellore; **GB Pant**: Govind Ballabh Pant Hospital, New Delhi; **PGIMER**: Post Graduation Institute of Medical Education and Research, Chandigarh; **SGPGI**: Sanjay Gandhi Post Graduate Institute, Lucknow

Abbreviations: ERCP: endoscopic retrograde cholangiopancreatography; FNA: fine needle aspiration; GI: Gastrointestinal; GVHD: graft versus host disease; CBD: common bile duct; IBD: inflammatory bowel disease; NJ: Nasojejunal tube; PEG: percutaneous endoscopic gastrostomy; RT: Ryles tube; SEMS: self-expanding metal stent; SM: submucosal; SRUS: solitary rectal ulcer syndrome; TEF: Tracheoesophageal fistula;

**Members of GAIN Group (in alphabetical order)**Ashish Agarwal, MD<sup>1</sup>Samagra Agarwal, MD<sup>1</sup>Vineet Ahuja, MD<sup>1</sup>Abhinav Anand, MD<sup>1</sup>Rajat Bansal, MD<sup>1</sup>VikasBanyal, MD<sup>1</sup>Ptaviva Chandra, Bsc (Nursing)<sup>4</sup>Kaushik Chatterjee, MD<sup>3</sup>Sudipta Dhar Chowdhury, MD<sup>3</sup>AnugrahDhooria, MD<sup>1</sup>Amit Kumar Dutta, MD<sup>3</sup>Usha Dutta, MD<sup>2</sup>Anshuman Elhence, MD<sup>1</sup>Pramod Garg, MD<sup>1</sup>John Titus George, MD<sup>3</sup>Roshan George, MD<sup>5</sup>Srikanth Gopi, MD<sup>1</sup>Deepak Gunjan, MD<sup>1</sup>Arpan Jain, MD<sup>5</sup>Rajeeb Jaleel, MD<sup>3</sup>YegurlaJatin, MD<sup>1</sup>Vikas Jindal, MD<sup>1</sup>Anjilivelil Joseph, MD<sup>3</sup>

Bhaskar Kante, MD

Kanav Kaushal, MD<sup>1</sup>Saurabh Kedia, MD<sup>1</sup>Rakesh Kochhar, MD<sup>2</sup>Soumya Jagannath Mahapatra, MD<sup>1</sup>GovindMakharia, MD<sup>1</sup>Harshal S Mandavdhare, MD<sup>2</sup>Anurag Mishra, MD<sup>5</sup>Samir Mohindra, MD<sup>4</sup>SrikantMohta, MD<sup>1</sup>

Gaurav Muktesh, MD<sup>2</sup>

Sandeep Kumar Mundhra, MD<sup>1</sup>

Piyush Pathak, MD<sup>1</sup>

Shubham Prasad, MD<sup>1</sup>

Mahendra Singh Rajput<sup>1</sup>

Praveer Rai, MD<sup>2</sup>

Atul Rana, MD<sup>1</sup>

Sanjeev Sachdeva, MD<sup>5</sup>

Anoop Saraya, MD<sup>1</sup>

PabitraSahu, MD<sup>1</sup>

Jayanta Samanta, MD<sup>2</sup>

Vivek Saraswat, MD<sup>4</sup>

Rahul Sethia, MD<sup>1</sup>

Jimil Shah, MD<sup>2</sup>

Shalimar, MD<sup>1</sup>

Sanchit Sharma, MD<sup>1</sup>

Vishal Sharma, MD<sup>2</sup>

Jayendra Shukla, MD<sup>2</sup>

Ebby George Simon, MD<sup>3</sup>

Alok Kumar Singh, MD<sup>5</sup>

Amit Anurag Singh, MD<sup>1</sup>

Manas Vaishnav, MD<sup>1</sup>

Sudheer Kumar Vuyurru, MD<sup>1</sup>

1. All India Institute of Medical Sciences, New Delhi, India

2. Post Graduate Institute of Medical Educations and Research, Chandigarh, India

3. Christian Medical College, Vellore, India

4. Sanjay Gandhi Post Graduate Institute, Lucknow, India

5. Gobind Ballabh Pant Hospital, New Delhi, India
